# Supplementary material for: Colorimetric Detection of Urease-Producing Microbes Using an Ammonia-Responsive Flexible Film Sensor
Source: MDPI journal article supplement (doi:10.3390/bios12100886), 2022-10-17
Supplement: s1 [file s1]

[Supplementary information]

# Colorimetric Detection of Urease-Producing Microbes Using an Ammonia-Responsive Flexible Film Sensor

Yunsoo Chang <sup>1</sup>, Tae-Eon Park <sup>2</sup>, Seung-Woo Lee <sup>3,4,\*</sup> and Eun-Hee Lee <sup>1,\*</sup>

<sup>1</sup> Department of Microbiology, Pusan National University, Busan 46241, Korea

<sup>2</sup> Center for Spintronics, Korea Institute of Science and Technology, Seoul 02792, Korea

<sup>3</sup> Department of Fine Chemistry, Seoul National University of Science and Technology, Seoul 01811, Korea

<sup>4</sup> Center for Functional Biomaterials, Seoul National University of Science and Technology, Seoul 01811, Korea

\* Correspondence: swlee@seoultech.ac.kr (S.-W.L.); leeeh@pusan.ac.kr (E.-H.L.)

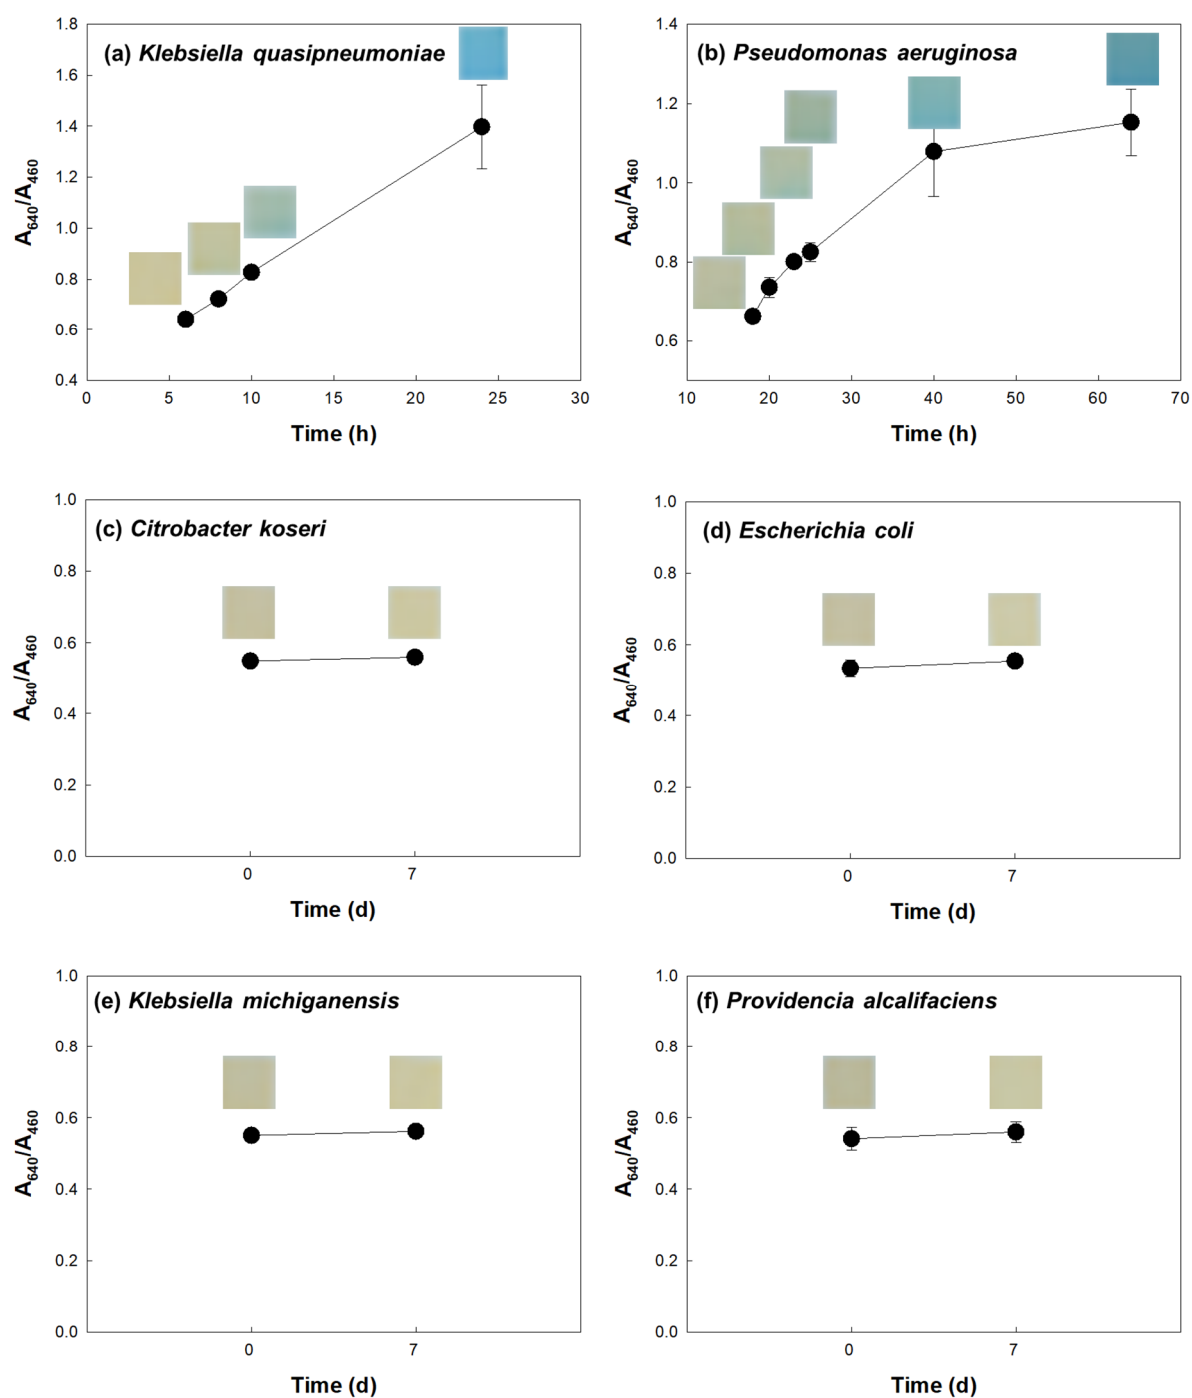

**Figure S1. (a–f)** Colorimetric detection of ureolytic bacteria using the designed film sensor.  $A_{640}/A_{460}$  values of sensors exposed to indicated bacteria plotted against incubation duration. Insets show photographs of the sensors. Symbols and error bars represent the mean and standard deviations of biological triplicates.
